## **Stanford Accelerated Intelligent Neuromodulation Therapy for Treatment-Resistant Depression (SAINT-TRD)**

Eleanor J. Cole, Katy H. Stimpson, Merve Gulser, Kirsten Cherian, Claudia Tischler, Romina Nejad, Brandon S. Bentzley, Heather Pankow, Elizabeth Choi, Haley Aaron, Flint M. Espil, Jaspreet Pannu, Xiaoqian Xiao, Dalton Duvio, Hugh B. Solvason, Jessica Hawkins, Jennifer Keller, Alan F. Schatzberg, Keith D. Sudheimer<sup>&\*</sup>, Nolan R. Williams<sup>&\*</sup>

<sup>\*</sup>Corresponding Authors

<sup>&</sup>Co-Senior Authors

## **Abstract**

**Background:** Current treatments for depression are limited by suboptimal efficacy, delayed response, and frequent side effects. Intermittent theta-burst stimulation (iTBS) is a non-invasive brain stimulation treatment which is FDA-approved for treatment-resistant depression. Recent studies suggest several improvements could be made to iTBS by 1) precision targeting of the left dorsolateral prefrontal cortex (L-DLPFC) to subgenual anterior cingulate cortex (sgACC) circuit, 2) treating with multiple sessions per day at spaced intervals and 3) applying a higher overall pulse dose of stimulation.

**Objective:** Examine the feasibility, tolerability, and preliminary efficacy of an accelerated, high-dose iTBS protocol for treatment-resistant depression (TRD) termed 'Stanford Accelerated Intelligent Neuromodulation Therapy (SAINT)'.  
**Methods:** Thirty-one participants with TRD received open-label SAINT. Resting-state functional connectivity MRI (fcMRI) was used to individually target the region of L-DLPFC most anti-correlated with sgACC. Fifty iTBS sessions (1800 pulses per session, 50-minute inter-session interval) were delivered as 10 daily sessions over 5 consecutive days at 90% resting motor threshold depth-adjusted. Neuropsychological testing was conducted before and after SAINT.

**Results:** There was an average 87.24% reduction in MADRS score. 28/31 participants (90.32%) met criteria for remission ( $\leq 10$  on the MADRS). All participants were remitted on measures of suicidal ideation. Neuropsychological testing demonstrated no negative cognitive side-effects. There were no seizures or other severe adverse events.

**Discussion:** Our highly accelerated, high-dose, iTBS protocol with fcMRI-guided targeting (SAINT) was well tolerated and safe. Efficacy was strikingly high, especially for this treatment-resistant population. Double-blinded sham-controlled trials are required to confirm the high remission rate found in this initial study.

## **Introduction**

Depression is the leading cause of disability worldwide and approximately 800,000 suicides are completed each year <sup>1,2</sup>. Current FDA-approved antidepressant treatments do not achieve remission in the majority of patients with treatment-resistant depression (TRD) <sup>3-5</sup>, are limited by tolerability <sup>6</sup> and have extended treatment durations which do not match the imminent risk to suicidal patients <sup>7-9</sup>. New antidepressant treatments are needed that are rapid-acting, more effective, durable and targeted, to reduce side-effects.

Repetitive transcranial magnetic stimulation (rTMS) delivered to the left dorsolateral prefrontal cortex (L-DLPFC) is an FDA-approved, targeted, non-invasive brain stimulation technique for TRD <sup>10,11</sup>. rTMS involves passing an electric current through a magnetic coil placed on the scalp, producing a high-intensity magnetic field that passes through the scalp, skull and meninges and excites neuronal tissue <sup>12</sup>. Repeated high-frequency excitation of the same brain region results in the successive strengthening of synapses through a process known as long-term potentiation (LTP) <sup>13,14</sup> causing lasting changes in functional connectivity <sup>13,15</sup>. The antidepressant responses induced by rTMS are predicted to be the result of strengthened indirect inhibitory connections between the L-DLPFC and sgACC <sup>15,16</sup>.

A more efficient form of rTMS, known as intermittent theta-burst stimulation (iTBS), has been developed which has significantly shortened the duration of treatment sessions from 37 minutes to 3 minutes <sup>17</sup> producing equivalent antidepressant responses <sup>18,19</sup>. FDA-approved rTMS and iTBS courses involve daily stimulation sessions for six weeks, achieving remission in 32% of patients and response in 49%, with an open label, non-inferiority design <sup>18</sup>. Studies suggest that the efficacy of iTBS could be improved by accelerated delivery <sup>20-22</sup>, higher overall stimulation doses <sup>9,23,24</sup> and more accurate targeting <sup>15,25</sup>. Furthermore, there has never been a dose-response curve for therapeutic rTMS.

This study aimed to examine the feasibility, safety and preliminary efficacy of an accelerated, high-dose iTBS protocol using functional connectivity magnetic resonance imaging (fcMRI)-guided targeting. Five consecutive days of 10-daily iTBS sessions (1800 pulses per session) were delivered to the region of the L-DLPFC that was most anti-correlated to the sgACC in each individual <sup>26</sup>. The individualized functional connectivity-guided targeting, accelerated delivery and high dose of stimulation were predicted to collectively result in higher response and remission rates than FDA-approved TMS protocols. This protocol was termed 'Stanford Accelerated Intelligent Neuromodulation Therapy (SAINT)' to distinguish this protocol from other attempts at accelerated iTBS delivery without the targeting and high dose <sup>27,28</sup>. We recently published a smaller series demonstrating efficacy in the most severe cohort <sup>26</sup>.

## **Methods**

### **Participants**

Thirty-three participants with TRD (aged 19-78, 20 female) were recruited for this study. Twenty-four participants had a diagnosis of Major Depressive Disorder (MDD), six participants had a diagnosis of bipolar disorder (two bipolar 1) and three participants had depression in Parkinson's Disease (DPD). Diagnoses of depression or bipolar disorder were confirmed by the study psychiatrist who performed the Mini International Neuropsychiatric Interview (MINI).

Participants were required to have a Hamilton Depression Rating Scale 17-item (HDRS-17) score higher than 20 and not have responded to at least one antidepressant medication (minimum trial duration of 6 weeks at an appropriate dose according to the Antidepressant Treatment History Form; ATHF) to be eligible for the study. Urine samples were collected to

screen for drug use and pregnancy. Participants were recruited through the Depression Research Clinic at Stanford University, Facebook advertising and clinic referrals. All participants provided written informed consent and the study was approved by the Stanford University Institutional Review Board.

One participant was excluded for having a motor threshold that was too high (>90% machine output) and one participant with a history of high anxiety dropped out after the first day of stimulation due to high anxiety levels (Young Mania Rating Scale (YMRS) and HDRS-17 scores had not increased from baseline). This resulted in a final participant sample of 31 participants (aged 19-78, 19 female). See Table 1 for participant demographic information and treatment history. Participants were required to maintain the same antidepressant regimen throughout the study enrollment (see Supplementary Table 1 for information regarding the medication participants were taking during study enrollment).

**Table 1:** Demographic information and treatment history for all participants (n=31)

| <b>Participant info</b>                                   | <b>Mean (SD)</b> |
|-----------------------------------------------------------|------------------|
| Gender (male:female)                                      | 12:19            |
| Age                                                       | 48.12 (17.05)    |
| Age of onset of depression                                | 22.45 (9.88)     |
| Duration of depression                                    | 25.56 (15.86)    |
| Number of antidepressant failures (lifetime) <sup>1</sup> | 8.84 (6.03)      |
| Number of adjunctive medications (lifetime) <sup>2</sup>  | 1.48 (1.39)      |
| Number of participants attempted rTMS                     | 14*              |
| Number of participants attempted ECT                      | 7**              |
| Maudsley Staging Method Score                             | 11.16 (2.03)     |

<sup>1</sup>Adequate antidepressant trials defined as a minimum of 6 weeks

<sup>2</sup>Medications defined as adequate augmentation strategies according to the Anti-depressant Treatment History Form (ATHF).

\*One remitter, all other participants did not respond.

\*\*One remitted to bilateral but did not respond to unilateral, all other participants were non-responders.

### Functional magnetic resonance imaging (fMRI)

Before the stimulation course, each participant had both structural magnetic resonance imaging (MRI) and resting-state functional MRI (fMRI) scans. All participants were screened for MRI safety prior to any scanning procedures. All MRI scans were acquired using a 3T GE Discovery MR750 scanner with a 32-channel imaging coil at the Center for Cognitive and Neurobiological Imaging at Stanford, using a 3x accelerated multiband imaging sequence (TR=2 seconds).

The resting state scan consisted of a single 8-minute eyes-open resting scan.

Two participants did not take part in the MRI portion of the study as one participant had a BMI which was above the limit of the scanner (BMI>35) and one participant had a spinal stimulator. For these participants, their heads were registered to the MNI brain and anatomical coordinates previously shown to result in superior clinical outcomes compared to the standard 5cm rule were used for coil placement (-46, 45, 38)<sup>29</sup>. This target has also shown to be more anti-correlated to the sgACC than the area identified by the 5cm rule<sup>15</sup>.

### Stanford Accelerated Intelligent Neuromodulation Therapy

A Magventure Magpro X100 (MagVenture A/S, Denmark) system was used to deliver sessions of iTBS; 60 cycles of 10 bursts of 3 pulses at 50Hz were delivered in 2 second trains (5Hz) with an 8 second inter-train interval. Stimulation sessions were delivered hourly<sup>20-22</sup>. Ten sessions were applied per day (18,000 pulses/day) for five consecutive days (90,000 pulses in total). Stimulation was delivered at 90% resting motor threshold<sup>30,31</sup>. A depth correction<sup>32</sup> was applied to the resting motor threshold to adjust for difference in the cortical depth of the individual's functional target compared to the primary motor cortex in order to consistently achieve 90% rMT in the intended functional target. The Localite Neuronavigation System (Localite GmbH, Sankt Augustin, Germany) was used to position the TMS coil over the individualized stimulation target.

Participants in full remission prior to the end of the five-day stimulation course, were given the option to either finish early or complete the full course. One participant with a diagnosis of Bipolar type 1 finished treatment after the first day and one participant with Parkinson's finished treatment after 3 days. All other participants completed the full five-day treatment course.

### Clinical assessments

Prior to receiving any stimulation, participants' depressive symptoms and suicidal ideation were assessed using the Hamilton Depression Rating Scale-17 item (HDRS-17), Montgomery-Asberg Depression Rating Scale (MADRS) and Columbia-Suicide Severity Rating Scale (C-SSRS). A self-report measure was also used; the Beck Depression Inventory II (BDI-II). The degree of treatment-resistance was calculated using the Maudsley Staging Method (MSM<sup>33</sup>) and symptoms of mania were screened for using the Young Mania Rating Scale (YMRS). At the end of each day of stimulation (ten sessions), depressive symptoms were assessed using the Hamilton Depression Rating Scale 6-item (HDRS-6); participants also completed the BDI-II. The YMRS was completed daily to ensure hypomania had not been induced in any participants<sup>34-36</sup>. The same clinical assessments used at baseline were conducted approximately 72 hours after the stimulation course (immediate follow-up) as well as 2 weeks and one month after the stimulation course in order to assess the durability of the response.

A neuropsychological test battery was administered before SAINT, approximately 72 hours after the SAINT course and one month after the SAINT course in order to capture any neurocognitive side effects. The Hopkins Verbal Learning Test – Revised (HVLT-R)<sup>37</sup>, the Brief Visuospatial Memory Test – Revised (BVMT-R)<sup>38</sup>, subtests from the Wechsler Adult Intelligence Scale (4th Ed.) (WAIS-IV)<sup>39</sup> and various tests from the Delis Kaplan Executive Function System (D-KEFS)<sup>40</sup> were used. See supplementary material for a full list of neuropsychological tests that were used. These neuropsychological tests have been shown to have good psychometric properties<sup>37,38,40,41</sup> and assessed verbal learning and memory, visuospatial learning and memory, working memory, attention, processing speed, cognitive inhibition, cognitive switching, problem solving, and verbal fluency. See supplementary material for more details.

### fMRI analysis for target generation

Personalized L-DLPFC targets were generated for each participant using the resting-state scan. All analyses were conducted in a participant's own brain space (i.e., not warped to standardized-brain space). Resting-state scans were pre-processed according to typical methods using Statistical Parametric Mapping (SPM12) software. The resting-state scans were motion corrected and resliced. The T1 weighted structural scan was then co-registered with the resting-state scans. The resting-state scans were then spatially smoothed with a 3mm Gaussian kernel, detrended using a linear model of the global signal<sup>42</sup>, and band-pass filtered to preserve the typical resting-state frequencies (0.1Hz-0.01Hz). Next, the estimation parameters to warp the T1 weighted structural image into Montreal Neurological Institute (MNI) space was calculated using SPM segmentations based on tissue probability maps. These normalization parameters were inverted and applied to MNI space regions of interests (ROIs) for the L-DLPFC (Brodmann area 46) and the sgACC (BA25). This inverse normalization served to map the MNI space ROIs onto the individual participant's brain. The participant-space ROIs were then resliced, smoothed, and binarized to match the dimensions of the resting state scans.

The participant-space ROI for the L-DLPFC formed the search area for the optimal TMS coil placement. Two separate algorithms were used to determine coil placement. The first algorithm sorted each of the DLPFC and sgACC voxels into functional sub-units using a hierarchical agglomerative clustering algorithm. Median time series were then created for each functional subunit and the correlation coefficients were calculated between all median time series extracted from all functional subunits of the L-DLPFC and sgACC. The second algorithm determined the optimal L-DLPFC subunit to target based on three factors: the net correlation/anti-correlation of the L-DLPFC subunit with sgACC subunits, the size of the subunit and the spatial concentration of the subunit. See supplementary methods for more details on these algorithms. 3D maps of the whole brain correlation coefficient of the selected L-DLPFC subunit were then created and used to target the coil placement using the Localite TMS Navigation software (Localite GmbH, Sankt Augustin, Germany).

### Clinical outcome analysis

Our primary outcome measure was percentage change in MADRS scores and these changes were used to calculate response and remission rates. Response was defined as >50% reduction in MADRS score and remission was defined as MADRS score  $\leq 10$ <sup>43</sup>. Reductions in HDRS-17, HDRS-6, BDI-II and C-SSRS scores were used as secondary outcome measures. Daily HDRS-6 scores were used to calculate the average number of days of stimulation required to reach responder criteria (<50% HDRS-6) and remission criteria (<5 on HDRS-6). The influence of treatment-resistance (MSM score) on the number of stimulation days required to reach responder/remitter criteria was explored using linear regression analysis.

In order to make comparisons to the response and remission rates found in both iTBS and TMS pivotal trials<sup>44-46</sup>, all of the above analyses were also conducted with only the MDD participants (n=22). See Supplementary Table 2 for demographic information for the MDD subsample.

The number of days of stimulation required to induce response/remission in participants who had previously failed a course of rTMS were calculated in order to determine whether these participants met responder criteria after the equivalent amount of stimulation as an FDA-approved treatment course. Potential differences in duration of response for previous rTMS non-responders were examined by comparing percentage change in MADRS score at two weeks and one month after SAINT between rTMS non-responders and the rest of the participant sample. These data were not normally distributed even after being log transformed so an aligned rank transform was applied<sup>47</sup>. A mixed model ANOVA with time point (immediate, 2

weeks and 4 weeks) as within-subjects factor and group (TMS non-responder or rest of the participant sample) as between-subjects factor was used to analyze the transformed data. Post-hoc independent sample t-tests were then used to compare percentage change in MADRS score across groups at each time point.

Eleven participants were re-treated once their symptoms returned to baseline. The percentage change in MADRS score data were not normally distributed therefore a Wilcoxon signed-rank test was used to assess whether SAINT re-treatment was able to produce equivalent antidepressant responses.

Scores on the neuropsychological tests pre- and post-SAINT were compared using paired t-tests. Neuropsychological test data were available for 22 participants.

## **Results**

### **Safety**

No serious adverse events occurred. The only side-effects participants reported were fatigue and some discomfort at both the stimulation site and in the facial muscles during stimulation. The neuropsychological test battery showed no negative cognitive side-effects following SAINT. There were no significant changes in neurocognitive performance (neurocognitive data will be uploaded as a supplementary file after May 2019).

### **Response and remission rates**

Depressive symptoms were significantly reduced following SAINT, with an average 87.24% reduction in MADRS score from 37.71 (7.24) to 4.81 (6.41). The response rate (>50% MADRS score) was 90.32% and all responders were in full remission (MADRS score  $\leq 10$ ). Results were similar across all clinical assessments (see Table 2). In addition to the reduction in depressive symptoms, 100% of participants were remitted on measures of suicidal ideation (C-SSRS, HDRS-Q3 and MADRS-Q10) following the course of SAINT (see Table 2).

Table 2: Clinical assessment scores for all participants n=31; mean (SD)

|                           | Pre-SAINT     | Post-SAINT  | Responders (%) <sup>1</sup> | Remission (%) <sup>2</sup> |
|---------------------------|---------------|-------------|-----------------------------|----------------------------|
| <b>MADRS</b>              | 37.71 (7.24)  | 4.81 (6.41) | 90.32                       | 90.32                      |
| <b>HAMD-17</b>            | 27.87 (5.23)  | 4.55 (5.07) | 90.32                       | 83.87                      |
| <b>HAMD-6</b>             | 15.23 (2.80)  | 2.39 (3.32) | 87.10                       | 83.87                      |
| <b>BDI<sup>3</sup></b>    | 32.50 (12.22) | 6.50 (7.10) | 87.50                       | 85.71                      |
| <b>C-SSRS<sup>4</sup></b> | 1.52 (1.29)   | 0.00 (.00)  | 100.00                      | 100.00                     |
| <b>HAMD-Q3</b>            | 1.52 (.85)    | 0.03 (.18)  | 96.77                       | 96.77                      |
| <b>MADRS-Q10</b>          | 2.39 (.99)    | 0.07 (.36)  | 96.77                       | 96.77                      |

<sup>1</sup>Response defined as >50% reduction in score.

<sup>2</sup>Remission defined <8 on HAMD-17 <sup>48</sup><5 on the HAMD-6 <sup>49</sup>, ≤10 on MADRS <sup>43</sup>, BDI<13 <sup>50</sup> and C-SSRS=0 <sup>51</sup>.

<sup>3</sup>n=28, four participants only had a post-SAINT BDI score so for % remission calculation n=28, and % response n=24.

<sup>4</sup>Current suicidal ideation subscale, n=26

The response and remission rates were very similar for the MDD subsample, see Supplementary Table 3 for response and remission rates for this subsample.

#### Time course of response

The average number of days of aiTBS required to elicit a response (≥50% reduction in HAMD-6 score) across all participants (n=29, daily HAMD-6 scores missing for 2 participants) was 2.46 (SD=1.26, ~25 treatments) and to achieve remission (HAMD-6 score <5) was 2.96 (SD=1.48, ~30 treatments). Similar time courses were seen for the MDD participants. See Figure 1 for percentage change in HAMD-6 score with each day of stimulation, for all participants (1A) and MDD participants (1B).



Figure 1

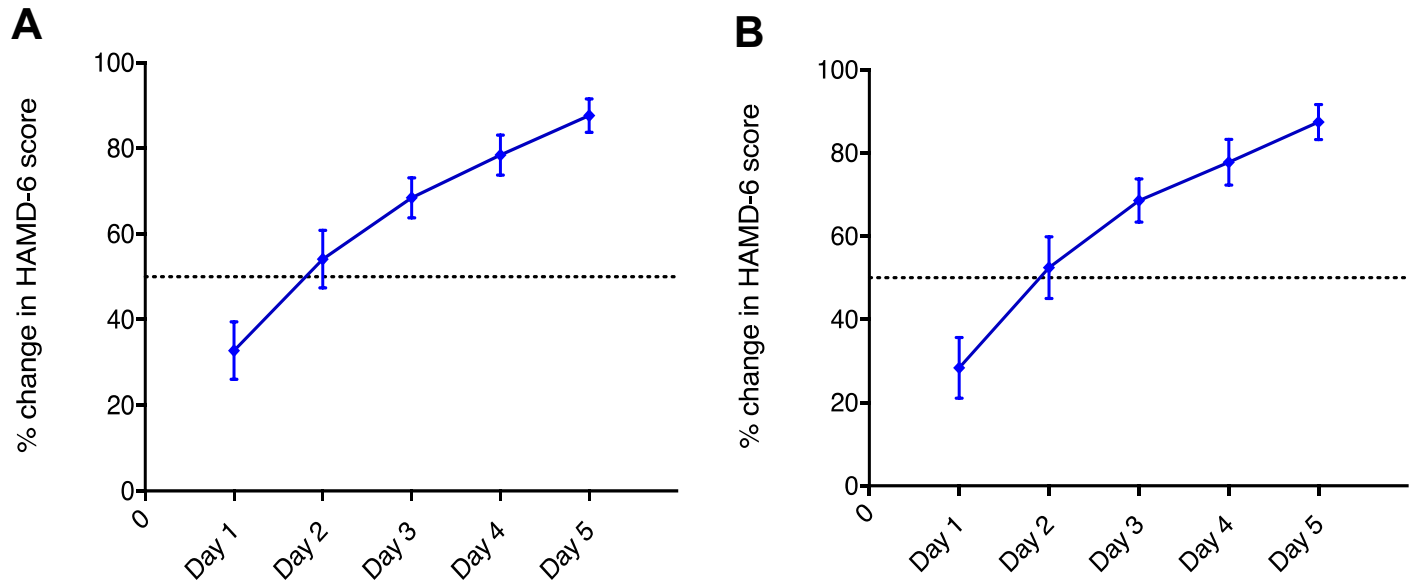

Figure 1: Average percentage change in Hamilton Depression Rating Scale score (6-item version) with each day of stimulation for A) All participants (n=29, daily HAMD-6 scores missing for two participants), diagnoses of MDD, bipolar and Parkinson's. B) MDD participants (n=21, daily HAMD-6 scores missing for one participant). Dotted lines indicate responder criteria and error bars represent standard error.

Participants who had previously not responded to a 6-week rTMS treatment course (rTMS non-responders, n=13) took longer to achieve responder criteria (M=3.08 days, SD=0.78, ~31 treatments) and remission criteria (M=3.70 days, SD=1.11, ~37 treatments; see Figure 2). None of the rTMS non-responders met responder criteria after the first day of aiTBS when the equivalent amount of stimulation as a 6-week FDA-approved iTBS course had been administered.

Figure 2

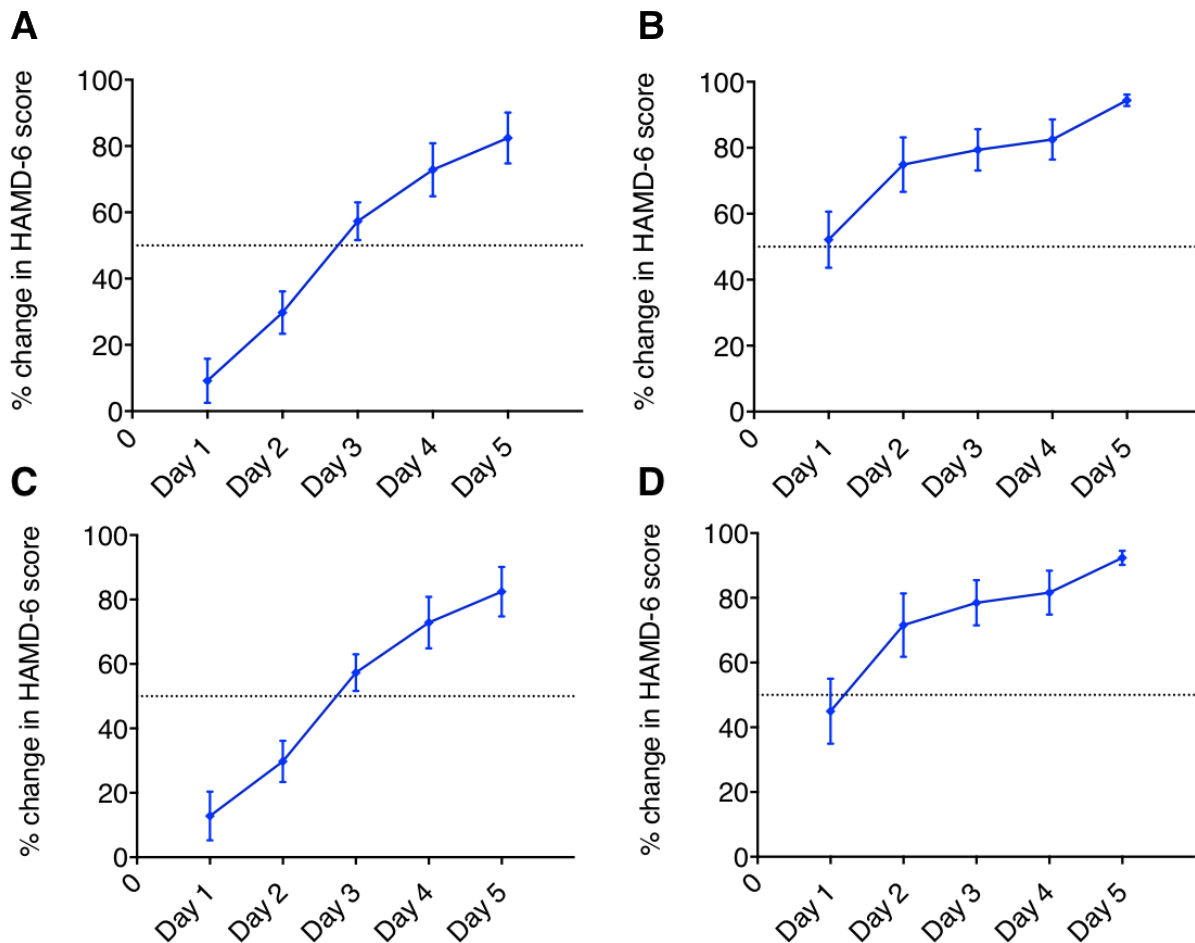

Figure 2: Average percentage change in Hamilton Depression Rating Scale score (6-item version) with each day of stimulation for A) All TMS non-responders (n=13), B) All other participants (n=16), C) MDD TMS non-responders (n=10), D) All other MDD participants (n=11). Dotted lines indicate responder criteria and error bars represent standard error.

There was a trend towards Maudsley score predicting the number of stimulation days required to achieve remission but neither the relationship between Maudsley score and days required to achieve remission ( $F(1,24)=4.01$ ,  $p<.06$ ,  $R^2=.14$ ) or response ( $F(1,26)=2.58$ ,  $p=.12$ ,  $R^2=.09$ ) reached significance. These relationships were also not significant for the MDD patients. See Figure 3.

Figure 3

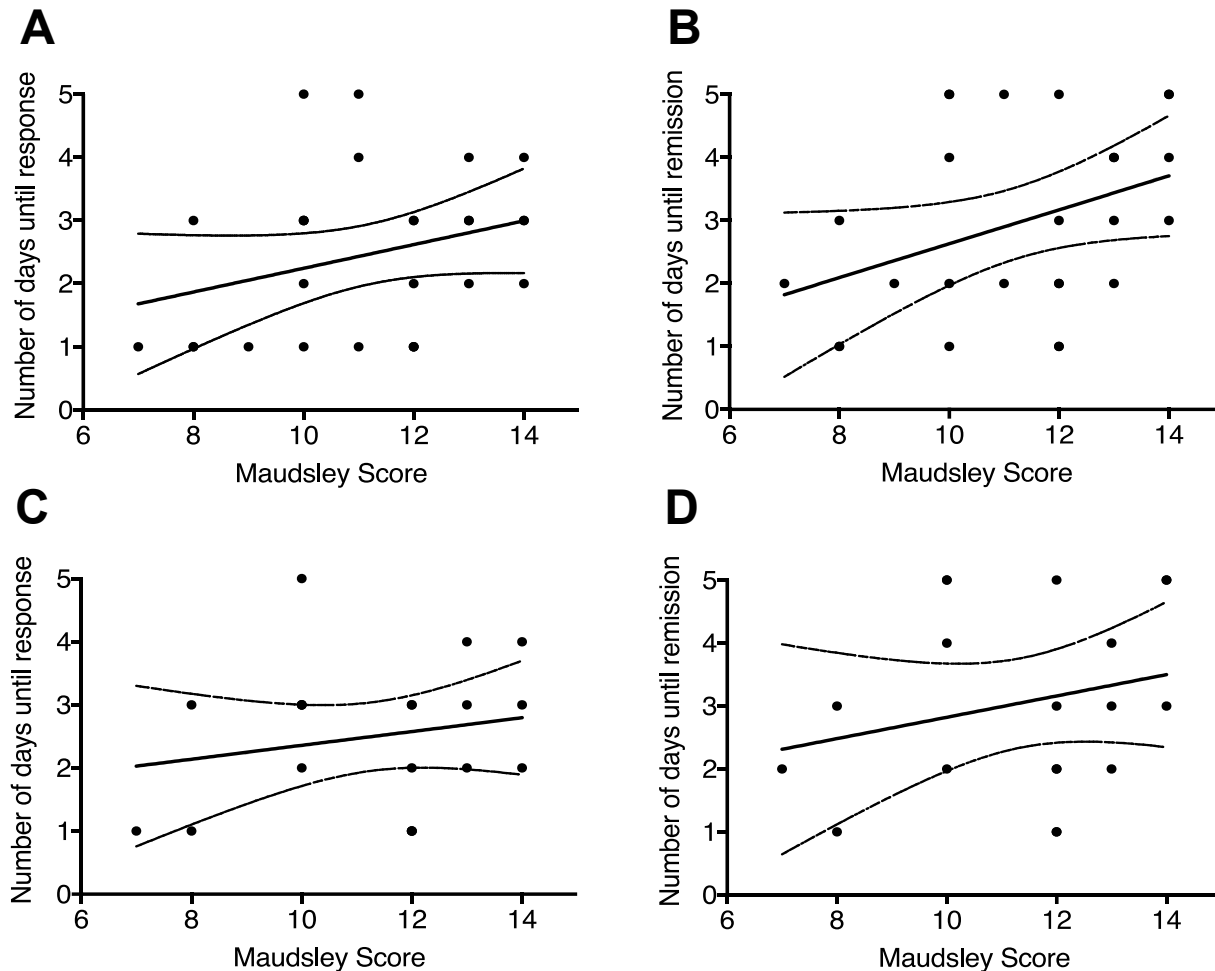

Figure 3: The relationship between Maudsley score and the number of days of SAINT needed for response ( $\geq 50\%$  reduction in HAMD-6 score) or remission (HAMD-6 score  $< 5$ ) for all participants (A & B, respectively) or MDD participants (C & D, respectively). Linear regression analyses found no significant relationships between Maudsley score and the number of days to reach response/remission in all participants [response;  $F(1,26) = 2.58$ ,  $p = .12$ ,  $R^2 = .09$ ], remission;  $F(1,24) = 4.01$ ,  $p < .06$ ,  $R^2 = .14$ ] and MDD participants [response;  $F(1,18) = 0.74$ ,  $p = .40$ ,  $R^2 = .04$ ], remission;  $F(1,17) = 1.07$ ,  $p = .32$ ,  $R^2 = .06$ ]. Dotted lines represent 95% confidence intervals.

#### Outcomes for previous rTMS non-responders

rTMS non-responders had significantly poorer outcomes two weeks and one month after the SAINT course compared to the rest of the participant sample (see Figure 4). A mixed model ANOVA found a significant interaction between group and time point [ $F(1.48, 41.44) = 4.63$ ,  $p = .02$ ,  $\eta^2 = .14$ ]. Follow-up independent sample t-tests found significantly lower percentage MADRS change for rTMS non-responders at 2 weeks [ $t(28) = -3.55$ ,  $p = .001$ ] and one month [ $t(25.71) = -5.08$ ,  $p < .001$ ] but initial responses to SAINT were equivalent to the rest of the participant sample [ $t(29) = -1.32$ ,  $p = .20$ ]. Across all participants, 60% of participants still met

responder criteria one month after the 5-day SAINT course and 95% were still remitted on the C-SSRS suicidal ideation subscale (see Supplementary Table 4). When the rTMS non-responders were excluded from these analyses, the response rate at one month was 83.33% with 100% of participants remitted on the C-SSRS suicidal ideation subscale (see Supplementary Table 6). Similar results were seen for the one-month data for MDD participants with and without the TMS non-responders included (see Supplementary Tables 5 and 7).

Figure 4

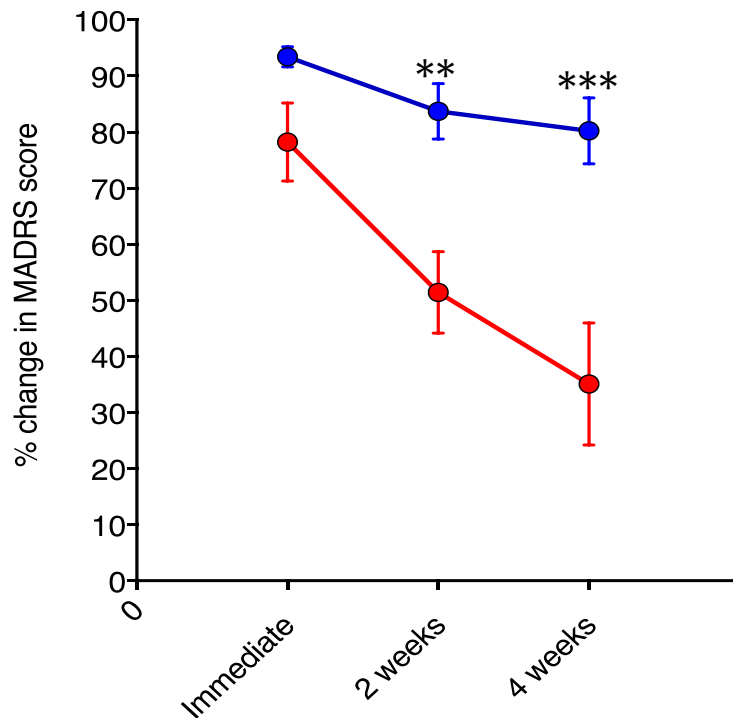

Figure 4: Percentage change in MADRS score immediately following the five-day stimulation course, 2 weeks and four weeks afterwards for TMS non-responders (red, n=13) and all other participants (blue, n=18). rTMS non-responses showed significantly lower percentage reduction in MADRS score at 2 weeks [ $t(28)=-3.55$ ,  $p=.001$ ] and one month [ $t(25.71)=-5.08$ ,  $p<.001$ ] after SAINT than the rest of the participant sample.

#### Re-treatment efficacy

Re-treatment data is available for eleven participants who were re-treated once they no longer met responder criteria (average time between treatments was 19.58 weeks,  $SD=13.49$ ). Percentage change in MADRS score did not significantly differ between initial treatment and re-treatment ( $Z=.00$ ,  $p=1.00$ ,  $r=.00$ , see Table 3).

Table 3: Percentage change in MADRS score for initial and re-treatment

| Participant | Diagnosis | Initial % change MADRS | Re-treatment % change MADRS |
|-------------|-----------|------------------------|-----------------------------|
| 1           | MDD       | 91.43                  | 85.71                       |
| 2           | MDD       | 97.67                  | 100.00                      |
| 3           | PD        | 97.50                  | 88.89                       |
| 4           | MDD       | 100.00                 | 100.00                      |
| 5           | MDD       | 83.64                  | 84.44                       |
| 6           | BPD       | 100.00                 | 100.00                      |
| 7           | MDD       | 44.12                  | 76.47                       |
| 8           | BPD       | 100.00                 | 100.00                      |
| 9           | MDD       | 100.00                 | 97.44                       |
| 10          | PD        | 100.00                 | 100.00                      |
| 11          | MDD       | 90.91                  | 95.45                       |

## Discussion

The aim of this study was to examine the safety, feasibility and preliminary efficacy of an accelerated high-dose iTBS, fMRI-guided treatment protocol (SAINT) for treatment-resistant depression (TRD). We found that SAINT can effectively reduce depressive symptoms and suicidal ideation in patients with severe TRD within 5 days without negative cognitive side-effects. The 90% remission rate is substantially higher than remission rates for open-label studies using standard FDA-approved treatment protocols<sup>18,52,53</sup>. This is also higher than ECT in TRD (~58%<sup>54</sup>) and in ketamine (29%-70.8%<sup>55-57</sup>). The extremely high remission rate in our study was found despite the inclusion of participants who had previously failed rTMS and ECT. The apparent higher efficacy of SAINT is likely due to the combination of the accelerated delivery of iTBS sessions, the high-dose of stimulation and the individualized targeting method used.

Although response and remission rates as high as those found in this study are unprecedented in TMS studies (rTMS/iTBS/cTBS), similar response rates have been found in deep brain stimulation trials for depression and Parkinson's Disease<sup>58,59</sup>. The apparent superior efficacy of our SAINT protocol over standard FDA-approved TMS protocols complements evidence from basic neuroscience research and human physiology data which suggest that multiple spaced daily iTBS sessions have an enhanced effect compared to the same number of single daily sessions<sup>20-22,60,61</sup>. Studies which have applied theta-burst protocols (cTBS/iTBS) to the motor cortex in humans have shown that two spaced stimulation sessions produce greater<sup>62</sup> and longer lasting<sup>61,63</sup> changes in cortical excitability than single stimulation sessions. Basic neuroscience research conducted using hippocampal slices have shown that multiple iTBS sessions delivered with inter-session intervals of 50-90 minutes have a cumulative effect on dendritic spine enlargement, a process involved in synaptic strengthening<sup>20-22,60</sup>. In comparison, iTBS sessions delivered with inter-session intervals of 40 minutes or less do not have a cumulative effect on dendritic spines<sup>20-22</sup>. Similarly, two iTBS sessions delivered to the prefrontal or motor cortex in humans only 15 minutes apart have shown not to increase cortical excitability further than a single iTBS session<sup>62,64</sup>. This could explain the limited efficacy of a previous attempt at of an accelerated iTBS protocol, which used an inter-session interval of only 15 minutes<sup>27,28</sup>.

The individualized targeting method used in our study may have also contributed to the high response and remission rates. The L-DLPFC is a large brain area which consists of a number of different subregions, some of which are correlated and some anti-correlated with sgACC activity<sup>63</sup>. Superior antidepressant responses to rTMS have been shown to be associated with higher anti-correlation between the L-DLPFC and sgACC<sup>15,65,66</sup>. Defining L-DLPFC using common techniques such as scalp-based measurements, structural MRI scans or fMRI activation patterns could result in stimulating a subregion of the L-DLPFC which is correlated rather than anti-correlated with the sgACC and therefore not drive the desired increase in anti-correlation between L-DLPFC and the sgACC<sup>67</sup>. The standard '5cm rule' scalp-based measurement has been shown to miss the L-DLPFC completely in >1/3 of cases<sup>68</sup>. A retrospective study conducted by Fox and colleagues found that individual differences in the degree of anti-correlation between the stimulated subregion of the L-DLPFC and the sgACC accounted for over 70% of the variability in clinical efficacy<sup>15</sup>. A recent interleaved TMS-fMRI study showed that stimulating the subregion of the L-DLPFC which displays the greatest degree of functional connectivity with the sgACC resulted in stimulation propagation to the sgACC in all participants<sup>69</sup>. In comparison, in a separate study when the L-DLPFC was defined anatomically (border of BA9/BA46), stimulation propagated to the sgACC in only 44% of participants<sup>70</sup>. In the pivotal iTBS study<sup>18</sup>, the aiTBS study by the Baeken group<sup>28</sup> and a blinded iTBS trial<sup>71</sup> the same anatomical target (border of BA9/BA46) was utilized, which may have contributed to the limited efficacy of the approach. By stimulating the subregion of the L-DLPFC which is most anti-correlated with the sgACC in each individual in this study, we may have reduced this variability in signal propagation and maximized treatment efficacy.

The high efficacy of our SAINT protocol also suggests that FDA-approved protocols may be under-dosing. Our protocol administered five-times the pulse dose of the FDA-approved iTBS protocol (90,000 pulses in comparison to the standard 18,000 iTBS pulses<sup>18</sup>). A previous study found that 61% of individuals who did not respond to the initial six weeks of stimulation, did respond with further treatment<sup>24</sup>. Another study utilizing double the FDA-approved number of pulses per session, demonstrated a higher remission rate<sup>72</sup>. Our SAINT protocol applied the equivalent amount of stimulation as a six-week treatment protocol each day of stimulation (18,000 pulses/day<sup>18</sup>). 31% of participants in our study met responder criteria after the first day of stimulation (n=9/29, daily HDRS-6 missing for 2 participants), this response rate is equivalent to response rates found after six-weeks of daily iTBS/rTMS sessions in individuals of this treatment-resistance level<sup>73,74</sup>. None of the previous rTMS non-responders in our study responded after the first day of SAINT (see Figure 3) but 87.5% of rTMS non-responders met responder criteria at the end of our SAINT protocol. These data indicate that a non-response to a standard six-week treatment protocol may reflect the need for a higher stimulation dose, for the majority of patients<sup>24</sup> which matches with recent trajectory data<sup>75</sup>. The apparent need for a higher number of pulses is consistent with other neuromodulation modalities such as deep brain stimulation in Parkinson's where an average of 500,000 pulses of stimulation are delivered to the STN or the GPi each day<sup>76</sup>. The need for a higher overall dose of stimulation may have also contributed to the limited efficacy of a previous attempt of an accelerated iTBS protocol which only delivered 32,400 pulses<sup>27</sup>. Our study administered the highest number of pulses per day and highest overall pulse-dose of any published study to date<sup>26</sup>. These findings are critically important for translating dosing/stimulation strategies across brain stimulation modalities<sup>77</sup>.

Previous rTMS non-responders in our study not only required more stimulation sessions to induce a clinically significant response but also showed less-durable responses than the rest of the participant sample. It is likely that depressed individuals with a higher degree of treatment-resistance display neuroplasticity impairments<sup>78</sup>. This is reflected in the pathological functional connectivity work<sup>79</sup>. The higher number of stimulation sessions required to induce

antidepressant responses could be due to deficits in processes involved in the early stages of LTP, such as AMPA receptor phosphorylation<sup>78,80</sup>. The shorter duration of antidepressant responses could be the result of dysfunction in later LTP processes which results in long-lasting changes to synaptic strength<sup>63</sup>. These processes include the synthesis of new proteins and gene expression changes such as the activation of transcription factors (e.g. CREB) and the induction of plasticity-enhancing genes such as BDNF<sup>78</sup>. Highly treatment-resistant individuals may require maintenance iTBS therapy<sup>81</sup> or even implanted epidural cortical stimulators<sup>77,82</sup> to sustain antidepressant responses.

The short duration of our SAINT protocol, the apparent reproducibility of responses and the lack of cognitive side-effects, add to the potential benefit of SAINT over existing treatments. The short duration of our SAINT protocol means SAINT could provide a rapid means of ensuring the safety of suicidal patients. Currently, there are only two rapid-acting treatments for suicidal ideation. One is ketamine/s-ketamine, a form of which has just been FDA-approved for treatment-resistant depression, but approximately 11% of patients report the dissociative symptoms as very disturbing<sup>83</sup>, the antidepressant efficacy of ketamine beyond a single infusion is not yet understood<sup>84,85</sup> and the opioid mechanism of action poses a potential risk<sup>84</sup>. The other available rapid-acting treatment is ECT, for which less than 2% of eligible patients receive due to concerns regarding cognitive side-effects and stigma<sup>86,87</sup>. In the majority of patients, ECT also takes 2 weeks or longer to produce remission from suicidal ideation<sup>88</sup>.

Our study is limited by the open-label design; a double-blind control trial is required to determine the efficacy of our SAINT protocol in comparison to an identical schedule of sham stimulation sessions. However, individuals with the same degree of treatment-refractoriness as the participants included in this study (severe treatment-resistance; >11 Maudsley Staging Method), have previously shown no placebo response to iTBS sessions of 1800 pulses<sup>71</sup>. Additionally, the most recent deep brain stimulation (DBS) sgACC trial for TRD included individuals with similar treatment-resistance levels to the patients in this report and had a response rate of only 20%<sup>89</sup>. A greater degree of placebo response would be expected for DBS as placebo response has generally been related to the degree of invasiveness of the intervention<sup>90</sup>. Other limitations of our study include the use of fixed stimulation frequencies, fixed inter-session intervals<sup>91,92</sup> and the lack of state-dependent stimulation<sup>93</sup>. It is likely that individualized stimulation frequencies will result in quicker and potentially more durable responses<sup>92,94</sup>. Some individuals may require slightly different inter-session intervals due to differences in cortical excitability profiles<sup>91,95</sup>. Finally, recent studies have shown that applying stimulation in particular brain states using real-time electroencephalography (EEG)-triggered transcranial magnetic stimulation (EEG-TMS) can increase cortical responses to stimulation<sup>93</sup>. Application of simultaneous TMS-EEG will be crucial to address these limitations in future studies.

In conclusion, the high-dose of stimulation, accelerated delivery and fMRI-guided individualized targeting method likely collectively resulted in the high antidepressant efficacy of this SAINT protocol. The extremely high remission rate was found despite the inclusion of participants who had previously not responded to rTMS and ECT. These rates are almost double those observed in TRD individuals receiving open-label ECT<sup>4</sup> which is currently the 'gold standard' treatment for TRD. Our data suggest that FDA-approved TMS protocols may be under-dosing, could potentially benefit from individualized targeting methods and accelerated delivery. The efficacy of SAINT at treating suicidal ideation and the short duration of the protocol suggest SAINT could provide a means of rapidly ensuring the safety of suicidal patients. Larger, double-blind, placebo-controlled trials are required to confirm the promisingly high response and remission rates found in this initial study.

## References

1. Reddy M. Depression: The disorder and the burden. *Indian J Psychol Med.* 2010. doi:10.4103/0253-7176.70510
2. World Health Organisation. WHO | Suicide data. WHO Website. doi:10.1109/TSE.2011.123
3. Berlim MT, Van Den Eynde F, Tovar-Perdomo S, Daskalakis ZJ. Response, remission and drop-out rates following high-frequency repetitive transcranial magnetic stimulation (rTMS) for treating major depression: A systematic review and meta-analysis of randomized, double-blind and sham-controlled trials. *Psychol Med.* 2014. doi:10.1017/S0033291713000512
4. Heijnen WT, Birkenhäger TK, Wierdsma AI, Van Den Broek WW. Antidepressant pharmacotherapy failure and response to subsequent electroconvulsive therapy: A meta-analysis. *J Clin Psychopharmacol.* 2010. doi:10.1097/JCP.0b013e3181ee0f5f
5. Sinyor M, Schaffer A, Levitt A. The Sequenced Treatment Alternatives to Relieve Depression (STAR\*D) trial: A review. *Can J Psychiatry.* 2010. doi:10.1177/070674371005500303
6. Penn E, Tracy DK. The drugs don't work? antidepressants and the current and future pharmacological management of depression. *Ther Adv Psychopharmacol.* 2012. doi:10.1177/2045125312445469
7. Blier P. Optimal use of antidepressants: when to act? *J Psychiatry Neurosci.* 2009.
8. Husain MM, Rush AJ, Fink M, et al. Speed of response and remission in major depressive disorder with acute electroconvulsive therapy (ECT): A consortium for research in ECT (CORE) report. *J Clin Psychiatry.* 2004. doi:10.4088/JCP.v65n0406
9. Perera T, George MS, Grammer G, Janicak PG, Pascual-Leone A, Wirecki TS. The Clinical TMS Society Consensus Review and Treatment Recommendations for TMS Therapy for Major Depressive Disorder. *Brain Stimul.* 2016;9(3):336-346. doi:10.1016/j.brs.2016.03.010
10. Micallef-Trigona B. Comparing the effects of repetitive transcranial magnetic stimulation and electroconvulsive therapy in the treatment of depression: A systematic review and meta-analysis. *Depress Res Treat.* 2014. doi:10.1155/2014/135049
11. Rossi S, Hallett M, Rossini PM, Pascual-Leone A. Safety, ethical considerations, and application guidelines for the use of transcranial magnetic stimulation in clinical practice and research. *Clin Neurophysiol.* 2009;120(12):2008-2039. doi:10.1016/j.clinph.2009.08.016
12. Taniguchi M, Cedzich C, Schramm J, et al. Transcranial magnetic stimulation and the human brain. *Neurosurgery.* 2003. doi:10.1038/35018000
13. Huerta PT, Volpe BT. Transcranial magnetic stimulation, synaptic plasticity and network oscillations. *J Neuroeng Rehabil.* 2009. doi:10.1186/1743-0003-6-7
14. Ogiue-Ikeda M, Kawato S, Ueno S. The effect of repetitive transcranial magnetic stimulation on long-term potentiation in rat hippocampus depends on stimulus intensity. *Brain Res.* 2003. doi:10.1016/j.brainres.2003.09.009
15. Fox MD, Buckner RL, White MP, Greicius MD, Pascual-Leone A. Efficacy of transcranial magnetic stimulation targets for depression is related to intrinsic functional connectivity with the subgenual cingulate. *Biol Psychiatry.* 2012. doi:10.1016/j.biopsych.2012.04.028
16. Kito S, Hasegawa T, Takamiya A, et al. Transcranial Magnetic Stimulation Modulates Resting EEG Functional Connectivity Between the Left Dorsolateral Prefrontal Cortex and Limbic Regions in Medicated Patients With Treatment-Resistant Depression. *J Neuropsychiatry Clin Neurosci.* 2017. doi:10.1176/appi.neuropsych.15120419
17. Huang YZ, Rothwell JC. The effect of short-duration bursts of high-frequency, low-



- intensity transcranial magnetic stimulation on the human motor cortex. *Clin Neurophysiol.* 2004;115(5):1069-1075. doi:10.1016/j.clinph.2003.12.026
18. Blumberger DM, Vila-Rodriguez F, Thorpe KE, et al. Effectiveness of theta burst versus high-frequency repetitive transcranial magnetic stimulation in patients with depression (THREE-D): a randomised non-inferiority trial. *Lancet.* 2018. doi:10.1016/S0140-6736(18)30295-2
  19. Blumberger DM, Vila-Rodriguez F, Dunlop K, et al. Intermittent theta-burst versus 10 Hz left dorsolateral prefrontal rTMS for treatment resistant depression: preliminary results from a two-site, randomized, single blind non-inferiority trial. *Brain Stimul.* 2015;8(2):329. doi:10.1016/j.brs.2015.01.067
  20. Smolen P, Zhang Y, Byrne JH. The right time to learn: Mechanisms and optimization of spaced learning. *Nat Rev Neurosci.* 2016. doi:10.1038/nrn.2015.18
  21. Kramar EA, Babayan AH, Gavin CF, et al. Synaptic evidence for the efficacy of spaced learning. *Proc Natl Acad Sci.* 2012. doi:10.1073/pnas.1120700109
  22. Lynch G, Kramár EA, Babayan AH, Rumbaugh G, Gall CM. Differences between synaptic plasticity thresholds result in new timing rules for maximizing long-term potentiation. *Neuropharmacology.* 2013. doi:10.1016/j.neuropharm.2012.07.006
  23. George MS, Wassermann EM, Kimbrell T a, et al. Mood improvement following daily left prefrontal repetitive transcranial magnetic stimulation in patients with depression: a placebo-controlled crossover trial. *Am J Psychiatry.* 1997;154(12):1752-1756. doi:10.1176/ajp.154.12.1752
  24. Yip AG, George MS, Tendler A, Roth Y, Zangen A, Carpenter LL. 61% of unmedicated treatment resistant depression patients who did not respond to acute TMS treatment responded after four weeks of twice weekly deep TMS in the Brainsway pivotal trial. *Brain Stimul.* 2017;10(4):847-849. doi:10.1016/j.brs.2017.02.013
  25. Weigand A, Horn A, Caballero R, et al. Prospective Validation That Subgenual Connectivity Predicts Antidepressant Efficacy of Transcranial Magnetic Stimulation Sites. *Biol Psychiatry.* 2018. doi:10.1016/j.biopsych.2017.10.028
  26. Williams NR, Sudheimer KD, Bentzley BS, et al. High-dose spaced theta-burst TMS as a rapid-acting antidepressant in highly refractory depression. *Brain.* 2018. doi:10.1093/brain/awx379
  27. Desmyter S, Duprat R, Baeken C, Van Autreve S, Audenaert K, van Heeringen K. Accelerated Intermittent Theta Burst Stimulation for Suicide Risk in Therapy-Resistant Depressed Patients: A Randomized, Sham-Controlled Trial. *Front Hum Neurosci.* 2016;10(September):480. doi:10.3389/fnhum.2016.00480
  28. Duprat R, Desmyter S, Rudi DR, et al. Accelerated intermittent theta burst stimulation treatment in medication-resistant major depression: A fast road to remission? *J Affect Disord.* 2016;200:6-14. doi:10.1016/j.jad.2016.04.015
  29. Fitzgerald PB, Hoy K, McQueen S, et al. A randomized trial of rTMS targeted with MRI based neuro-navigation in treatment-resistant depression. *Neuropsychopharmacology.* 2009. doi:10.1038/npp.2008.233
  30. Chung SW, Rogasch NC, Hoy KE, Sullivan CM, Cash RFH, Fitzgerald PB. Impact of different intensities of intermittent theta burst stimulation on the cortical properties during TMS-EEG and working memory performance. *Hum Brain Mapp.* 2018. doi:10.1002/hbm.23882
  31. Chung SW, Hoy KE, Fitzgerald PB. Theta-burst stimulation: A new form of tms treatment for depression? *Depress Anxiety.* 2015;32(3):182-192. doi:10.1002/da.22335
  32. Stokes MG. Simple Metric For Scaling Motor Threshold Based on Scalp-Cortex Distance: Application to Studies Using Transcranial Magnetic Stimulation. *J Neurophysiol.* 2005. doi:10.1152/jn.00067.2005
  33. Fekadu A, Wooderson SC, Markopoulou K, Cleare AJ. The maudsley staging method for

- treatment-resistant depression: Prediction of longer-term outcome and persistence of symptoms. *J Clin Psychiatry*. 2009;70(7):952-957. doi:10.4088/JCP.08m04728
34. Ozten E, Sayar GH, Karamustafalioglu O. Hypomanic shift observed during rTMS treatment of patients with unipolar depressive disorder: Four case reports. *Ann Gen Psychiatry*. 2013;12(1). doi:10.1186/1744-859X-12-12
  35. Krstic J, Ilic T. Switch to hypomania induced by repetitive transcranial magnetic stimulation and partial sleep deprivation added to antidepressant: A case report. *Vojnosanit Pregl*. 2014. doi:10.2298/VSP1402207K
  36. Xia G, Gajwani P, Muzina DJ, et al. Treatment-emergent mania in unipolar and bipolar depression: focus on repetitive transcranial magnetic stimulation. *Int J Neuropsychopharmacol*. 2008;11(1):119-130. doi:10.1017/S1461145707007699
  37. O'neil-Pirozzi TM, Goldstein R, Strangman GE, Glenn MB. Test-retest reliability of the Hopkins Verbal Learning Test-Revised in individuals with traumatic brain injury. *Brain Inj*. 2012. doi:10.3109/02699052.2012.694561
  38. Benedict RHB, Groninger L, Schretlen D, Dobraski M, Shpritz B. Revision of the brief visuospatial memory test: Studies of normal performance, reliability, and validity. *Psychol Assess*. 1996. doi:10.1037/1040-3590.8.2.145
  39. Wechsler D. WAIS-IV administration and scoring manual. 2008.
  40. DELIS DC, KRAMER JH, KAPLAN E, HOLDNACK J. Reliability and validity of the Delis-Kaplan Executive Function System: An update. *J Int Neuropsychol Soc*. 2004;10(02):301-303. doi:10.1017/S1355617704102191
  41. Hartman DE. Test review Wechsler Adult Intelligence Scale IV (WAIS IV): Return of the gold standard. *Appl Neuropsychol*. 2009. doi:10.1080/09084280802644466
  42. Macey PM, Macey KE, Kumar R, Harper RM. A method for removal of global effects from fMRI time series. *Neuroimage*. 2004. doi:10.1016/j.neuroimage.2003.12.042
  43. Zimmerman M, Posternak MA, Chelminski I. Derivation of a definition of remission on the Montgomery-Asberg depression rating scale corresponding to the definition of remission on the Hamilton rating scale for depression. *J Psychiatr Res*. 2004;38(6):577-582. doi:10.1016/j.jpsychires.2004.03.007
  44. George MS, Lisanby SH, Avery D, et al. Daily left prefrontal transcranial magnetic stimulation therapy for major depressive disorder: a sham-controlled randomized trial. *Arch Gen Psychiatry*. 2010;67(5):507-516. doi:10.1001/archgenpsychiatry.2010.46
  45. Levkovitz Y, Isserles M, Padberg F, et al. Efficacy and safety of deep transcranial magnetic stimulation for major depression: A prospective multicenter randomized controlled trial. *World Psychiatry*. 2015. doi:10.1002/wps.20199
  46. O'Reardon JP, Solvason HB, Janicak PG, et al. Efficacy and Safety of Transcranial Magnetic Stimulation in the Acute Treatment of Major Depression: A Multisite Randomized Controlled Trial. *Biol Psychiatry*. 2007;62(11):1208-1216. doi:10.1016/j.biopsych.2007.01.018
  47. Wobbrock JO, Findlater L, Gergle D, Higgins JJ. The aligned rank transform for nonparametric factorial analyses using only ANOVA procedures. *Proc SIGCHI Conf Hum Factors Comput Syst*. 2011:143-146. doi:10.1145/1978942.1978963
  48. Leucht S, Fennema H, Engel R, Kaspers-Janssen M, Lepping P, Szegedi A. What does the HAMD mean? *J Affect Disord*. 2013;148(2-3):243-248. doi:10.1016/j.jad.2012.12.001
  49. Timmerby N, Andersen JH, Søndergaard S, Østergaard SD, Bech P. A Systematic Review of the Clinimetric Properties of the 6-Item Version of the Hamilton Depression Rating Scale (HAM-D6). *Psychother Psychosom*. 2017. doi:10.1159/000457131
  50. Schulte-van Maaren YWM, Carlier IVE, Zitman FG, et al. Reference values for major depression questionnaires: the Leiden Routine Outcome Monitoring Study. *J Affect Disord*. 2013;149(1-3):342-349. doi:10.1016/j.jad.2013.02.009
  51. Posner K, Brown GK, Stanley B, et al. The Columbia-suicide severity rating scale: Initial

- validity and internal consistency findings from three multisite studies with adolescents and adults. *Am J Psychiatry*. 2011;168(12):1266-1277. doi:10.1176/appi.ajp.2011.10111704
52. Carpenter LL, Janicak PG, Aaronson ST, et al. Transcranial magnetic stimulation (TMS) for major depression: A multisite, naturalistic, observational study of acute treatment outcomes in clinical practice. *Depress Anxiety*. 2012;29(7):587-596. doi:10.1002/da.21969
  53. Janicak PG, Nahas Z, Lisanby SH, et al. Durability of clinical benefit with transcranial magnetic stimulation (TMS) in the treatment of pharmacoresistant major depression: Assessment of relapse during a 6-month, multisite, open-label study. *Brain Stimul*. 2010. doi:10.1016/j.brs.2010.07.003
  54. Haq AU, Sitzmann AF, Goldman ML, Maixner DF, Mickey BJ. Response of depression to electroconvulsive therapy: A meta-analysis of clinical predictors. *J Clin Psychiatry*. 2015. doi:10.4088/JCP.14r09528
  55. Murrough JW, Perez AM, Pillemer S, et al. Rapid and longer-term antidepressant effects of repeated ketamine infusions in treatment-resistant major depression. *Biol Psychiatry*. 2013. doi:10.1016/j.biopsych.2012.06.022
  56. Diamond PR, Farmery AD, Atkinson S, et al. Ketamine infusions for treatment resistant depression: A series of 28 patients treated weekly or twice weekly in an ECT clinic. *J Psychopharmacol*. 2014. doi:10.1177/0269881114527361
  57. Mathew SJ, Murrough JW, Aan Het Rot M, Collins KA, Reich DL, Charney DS. Riluzole for relapse prevention following intravenous ketamine in treatment-resistant depression: A pilot randomized, placebo-controlled continuation trial. *Int J Neuropsychopharmacol*. 2010. doi:10.1017/S1461145709000169
  58. Riva-Posse P, Choi KS, Holtzheimer PE, et al. A connectomic approach for subcallosal cingulate deep brain stimulation surgery: prospective targeting in treatment-resistant depression. *Molecular Psychiatry*. 2017.
  59. Groiss SJ, Wojtecki L, Südmeyer M, Schnitzler A. Deep brain stimulation in Parkinson's disease. *Ther Adv Neurol Disord*. 2009;2(6):20-28. doi:10.1177/1756285609339382
  60. Harris KM, Kater SB. Dendritic Spines: Cellular Specializations Imparting Both Stability and Flexibility to Synaptic Function. *Annu Rev Neurosci*. 1994;17(1):341-371. doi:10.1146/annurev.ne.17.030194.002013
  61. Tse NY, Goldsworthy MR, Ridding MC, et al. The effect of stimulation interval on plasticity following repeated blocks of intermittent theta burst stimulation. *Sci Rep*. 2018;8(1):8526. doi:10.1038/s41598-018-26791-w
  62. Nettekoven C, Volz LJ, Kutscha M, et al. Dose-Dependent Effects of Theta Burst rTMS on Cortical Excitability and Resting-State Connectivity of the Human Motor System. *J Neurosci*. 2014. doi:10.1523/JNEUROSCI.4993-13.2014
  63. Goldsworthy MR, Pitcher JB, Ridding MC. The application of spaced theta burst protocols induces long-lasting neuroplastic changes in the human motor cortex. *Eur J Neurosci*. 2012. doi:10.1111/j.1460-9568.2011.07924.x
  64. Chung SW, Rogasch NC, Hoy KE, Fitzgerald PB. The effect of single and repeated prefrontal intermittent theta burst stimulation on cortical reactivity and working memory. *Brain Stimul*. 2018. doi:10.1016/j.brs.2018.01.002
  65. Posse PR, Waters A, Choi K, Mayberg H. Connectomics in Subcallosal Cingulate Deep Brain Stimulation: Effective Connectivity as a Biomarker for Target Engagement. *Biol Psychiatry*. 2018. doi:10.1016/J.BIOPSYCH.2018.02.303
  66. Tik M, Hoffmann A, Sladky R, et al. Towards understanding rTMS mechanism of action: Stimulation of the DLPFC causes network-specific increase in functional connectivity. *Neuroimage*. 2017. doi:10.1016/j.neuroimage.2017.09.022
  67. Fox MD, Halko MA, Eldaief MC, Pascual-Leone A. Measuring and manipulating brain connectivity with resting state functional connectivity magnetic resonance imaging

- (fcMRI) and transcranial magnetic stimulation (TMS). *Neuroimage*. 2012;62(4):2232-2243. doi:10.1016/j.neuroimage.2012.03.035
68. Mir-Moghtadaei A, Caballero R, Fried P, et al. Concordance between BeamF3 and MRI-neuronavigated target sites for repetitive transcranial magnetic stimulation of the left dorsolateral prefrontal cortex. *Brain Stimul*. 2015. doi:10.1016/j.brs.2015.05.008
  69. Oathes DJ, Zimmerman J, Duprat R, et al. Individualized non-invasive brain stimulation engages the subgenual anterior cingulate and amygdala. *bioRxiv*. December 2018:503441. doi:10.1101/503441
  70. Vink JJT, Mandija S, Petrov PI, van den Berg CAT, Sommer IEC, Neggers SFW. A novel concurrent TMS-fMRI method to reveal propagation patterns of prefrontal magnetic brain stimulation. *Hum Brain Mapp*. 2018. doi:10.1002/hbm.24307
  71. Li CT, Chen MH, Juan CH, et al. Efficacy of prefrontal theta-burst stimulation in refractory depression: A randomized sham-controlled study. *Brain*. 2014;137(7):2088-2098. doi:10.1093/brain/awu109
  72. Kaster TS, Daskalakis ZJ, Noda Y, et al. Efficacy, tolerability, and cognitive effects of deep transcranial magnetic stimulation for late-life depression: a prospective randomized controlled trial. *Neuropsychopharmacology*. 2018. doi:10.1038/s41386-018-0121-x
  73. Grunhaus L, Dannon PN, Schreiber S, et al. Repetitive transcranial magnetic stimulation is as effective as electroconvulsive therapy in the treatment of nondelusional major depressive disorder: An open study. *Biol Psychiatry*. 2000. doi:10.1016/S0006-3223(99)00254-1
  74. Berlim MT, Van Den Eynde F. Repetitive transcranial magnetic stimulation over the dorsolateral prefrontal cortex for treating posttraumatic stress disorder: an exploratory meta-analysis of randomized, double-blind and sham-controlled trials. *Can J Psychiatry*. 2014;59(9):487-496. doi:10.1177/070674371405900905
  75. Kaster TS, Downar J, Vila-Rodriguez F, et al. Trajectories of Response to Dorsolateral Prefrontal rTMS in Major Depression: A THREE-D Study. *Am J Psychiatry*. February 2019:appi.ajp.2018.1. doi:10.1176/appi.ajp.2018.18091096
  76. Williams NR, Okun MS. Deep brain stimulation (DBS) at the interface of neurology and psychiatry. *J Clin Invest*. 2013. doi:10.1172/JCI68341
  77. Williams NR, Short EB, Hopkins T, et al. Five-Year Follow-Up of Bilateral Epidural Prefrontal Cortical Stimulation for Treatment-Resistant Depression. *Brain Stimul*. 2016;9(6):897-904. doi:10.1016/j.brs.2016.06.054
  78. Pittenger C, Duman RS. Stress, Depression and Neuroplasticity: A Convergence of Mechanisms. *Neuropsychopharmacology*. 2008;33(1):88-109. doi:10.1038/sj.npp.1301574
  79. Greicius MD, Supekar K, Menon V, Dougherty RF. Resting-state functional connectivity reflects structural connectivity in the default mode network. *Cereb Cortex*. 2009;19(1):72-78. doi:10.1093/cercor/bhn059
  80. Caudal D, Godsil BP, Mailliet F, Bergerot D, Jay TM. Acute stress induces contrasting changes in AMPA receptor subunit phosphorylation within the prefrontal cortex, amygdala and hippocampus. *PLoS One*. 2010. doi:10.1371/journal.pone.0015282
  81. Pridmore S, Erger S, Rybak M, Kelly E, May T. Early relapse (ER) transcranial magnetic stimulation (TMS) in treatment resistant major depression. *Brain Stimul*. 2018;11(5):1098-1102. doi:10.1016/J.BRS.2018.05.013
  82. Williams NR, Bentzley BS, Hopkins T, et al. Optimization of epidural cortical stimulation for treatment-resistant depression. *Brain Stimul*. 2018. doi:10.1016/j.brs.2017.09.001
  83. Correia-Melo FS, Argolo FC, Araújo-de-Freitas L, et al. Rapid infusion of esketamine for unipolar and bipolar depression: A retrospective chart review. *Neuropsychiatr Dis Treat*. 2017. doi:https://dx.doi.org/10.2147/NDT.S135623
  84. Grady SE, Marsh TA, Tenhouse A, Klein K. Ketamine for the treatment of major

- depressive disorder and bipolar depression: A review of the literature. *Ment Heal Clin.* 2017;7(1):16-23. doi:10.9740/mhc.2017.01.016
85. Murrough JW, Iosifescu D V., Chang LC, et al. Antidepressant efficacy of ketamine in treatment-resistant major depression: A two-site randomized controlled trial. *Am J Psychiatry.* 2013. doi:10.1176/appi.ajp.2013.13030392
  86. Slade EP, Jahn DR, Regenold WT, Case BG. Association of electroconvulsive therapy with psychiatric readmissions in US hospitals. *JAMA Psychiatry.* 2017. doi:10.1001/jamapsychiatry.2017.1378
  87. Sackeim HA. Modern electroconvulsive therapy: Vastly improved yet greatly underused. *JAMA Psychiatry.* 2017. doi:10.1001/jamapsychiatry.2017.1670
  88. Kellner CH, Fink M, Knapp R, et al. Relief of expressed suicidal intent by ECT: A consortium for research in ECT study. *Am J Psychiatry.* 2005. doi:10.1176/appi.ajp.162.5.977
  89. Holtzheimer PE, Husain MM, Lisanby SH, et al. Subcallosal cingulate deep brain stimulation for treatment-resistant depression: a multisite, randomised, sham-controlled trial. *The Lancet Psychiatry.* 2017. doi:10.1016/S2215-0366(17)30371-1
  90. Brim RL, Miller FG. The potential benefit of the placebo effect in sham-controlled trials: Implications for risk-benefit assessments and informed consent. *J Med Ethics.* 2013. doi:10.1136/medethics-2012-101045
  91. Du X, Summerfelt A, Chiappelli J, Holcomb HH, Hong LE. Individualized brain inhibition and excitation profile in response to paired-pulse TMS. *J Mot Behav.* 2014. doi:10.1080/00222895.2013.850401
  92. Maeda F, Keenan JP, Tormos JM, Topka H, Pascual-Leone A. Interindividual variability of the modulatory effects of repetitive transcranial magnetic stimulation on cortical excitability. *Exp Brain Res.* 2000. doi:10.1007/s002210000432
  93. Schaworonkoff N, Triesch J, Ziemann U, Zrenner C. EEG-triggered TMS reveals stronger brain state-dependent modulation of motor evoked potentials at weaker stimulation intensities. *Brain Stimul.* 2019. doi:10.1016/j.brs.2018.09.009
  94. Chung SW, Sullivan CM, Rogasch NC, et al. The effects of individualised intermittent theta burst stimulation in the prefrontal cortex: A TMS-EEG study. *Hum Brain Mapp.* 2019. doi:10.1002/hbm.24398
  95. Oberman L, Eldaief M, Fecteau S, Iffert-Miller F, Tormos JM, Pascual-Leone A. Abnormal modulation of corticospinal excitability in adults with Asperger's syndrome. *Eur J Neurosci.* 2012;36(6):2782-2788. doi:10.1111/j.1460-9568.2012.08172.x
  96. Grimm S, Beck J, Schuepbach D, et al. Imbalance between Left and Right Dorsolateral Prefrontal Cortex in Major Depression Is Linked to Negative Emotional Judgment: An fMRI Study in Severe Major Depressive Disorder. *Biol Psychiatry.* 2008;63(4):369-376. doi:10.1016/j.biopsych.2007.05.033
  97. Koenigs M, Grafman J. The functional neuroanatomy of depression: Distinct roles for ventromedial and dorsolateral prefrontal cortex. *Behav Brain Res.* 2009;201(2):239-243. doi:10.1016/j.bbr.2009.03.004
  98. Fitzgerald PB, Laird AR, Maller J, Daskalakis ZJ. A meta-analytic study of changes in brain activation in depression. *Hum Brain Mapp.* 2008. doi:10.1002/hbm.20426
  99. Hamani C, Mayberg H, Stone S, Laxton A, Haber S, Lozano AM. The subcallosal cingulate gyrus in the context of major depression. *Biol Psychiatry.* 2011. doi:10.1016/j.biopsych.2010.09.034
  100. Waters AC, Mayberg HS. Brain-based biomarkers for the treatment of depression: Evolution of an idea. *J Int Neuropsychol Soc.* 2017. doi:10.1017/S1355617717000881
  101. Lozano AM, Mayberg HS, Giacobbe P, Hamani C, Craddock RC, Kennedy SH. Subcallosal Cingulate Gyrus Deep Brain Stimulation for Treatment-Resistant Depression. *Biol Psychiatry.* 2008. doi:10.1016/j.biopsych.2008.05.034

102. Philip NS, Barredo J, Aiken E, Carpenter LL. Neuroimaging Mechanisms of Therapeutic Transcranial Magnetic Stimulation for Major Depressive Disorder. *Biol Psychiatry Cogn Neurosci Neuroimaging*. 2018. doi:10.1016/j.bpsc.2017.10.007
103. Nahas Z, Teneback CC, Kozel A, et al. Brain Effects of TMS Delivered Over Prefrontal Cortex in Depressed Adults. *J Neuropsychiatry Clin Neurosci*. 2001. doi:10.1176/jnp.13.4.459
104. Baeken C, Marinazzo D, Everaert H, et al. The impact of accelerated HF-rTMS on the subgenual anterior cingulate cortex in refractory unipolar major depression: Insights from <sup>18</sup>F-DG PET brain imaging. *Brain Stimul*. 2015;8(4):808-815. doi:10.1016/j.brs.2015.01.415
105. Loo CK, Sachdev PS, Haindl W, et al. High (15 Hz) and low (1 Hz) frequency transcranial magnetic stimulation have different acute effects on regional cerebral blood flow in depressed patients. *Psychol Med*. 2003. doi:10.1007/978-1-4614-1599-2
106. Cash RFH, Zalesky A, Thomson RH, Tian Y, Cocchi L, Fitzgerald PB. Subgenual Functional Connectivity Predicts Antidepressant Treatment Response to Transcranial Magnetic Stimulation: Independent Validation and Evaluation of Personalization. *Biol Psychiatry*. January 2019. doi:10.1016/j.biopsych.2018.12.002
107. Nyffeler T, Cazzoli D, Hess CW, Müri RM. One session of repeated parietal theta burst stimulation trains induces long-lasting improvement of visual neglect. *Stroke*. 2009. doi:10.1161/STROKEAHA.109.552323
108. Cazzoli D, Müri RM, Schumacher R, et al. Theta burst stimulation reduces disability during the activities of daily living in spatial neglect. *Brain*. 2012. doi:10.1093/brain/aws182
109. Peinemann A, Reimer B, Löer C, et al. Long-lasting increase in corticospinal excitability after 1800 pulses of subthreshold 5 Hz repetitive TMS to the primary motor cortex. *Clin Neurophysiol*. 2004. doi:10.1016/j.clinph.2004.02.005
110. Volz LJ, Benali A, Mix A, Neubacher U, Funke K. Dose-dependence of changes in cortical protein expression induced with repeated transcranial magnetic theta-burst stimulation in the rat. *Brain Stimul*. 2013. doi:10.1016/j.brs.2013.01.008
111. Janicak PG, Professor of Psychiatry is, Carpenter L. The Efficacy of Transcranial Magnetic Stimulation for Major Depression: A Review of the Evidence. *Psychiatr Ann*. 2014;44(6):284-292. doi:10.3928/00485713-20140609-06
112. Modirrousta M, Meek BP, Wikstrom SL. Efficacy of twice-daily vs once-daily sessions of repetitive transcranial magnetic stimulation in the treatment of major depressive disorder: A retrospective study. *Neuropsychiatr Dis Treat*. 2018. doi:10.2147/NDT.S151841
